# Supplementary material for: Circulating Plasma microRNAs can differentiate Human Sepsis and Systemic Inflammatory Response Syndrome (SIRS)
Source: PubMed Central journal article supplement (PMC4913253; doi:10.1038/srep28006), 2016-06-20
Supplement: srep28006-s1.pdf [file srep28006-s1.pdf]

1 **Circulating Plasma microRNAs can differentiate Human Sepsis and**  
2 **Systemic Inflammatory Response Syndrome (SIRS).**

3 Stefano Caserta\*<sup>1</sup>, Florian Kern<sup>1</sup>, Jonathan Cohen<sup>1</sup>, Stephen Drage<sup>2</sup>, Sarah F.  
4 Newbury<sup>1</sup>, Martin J. Llewelyn<sup>1,2</sup>

5 <sup>1</sup>Brighton and Sussex Medical School, Falmer, East Sussex, United Kingdom, BN1  
6 9PS;

7 <sup>2</sup>Brighton and Sussex University Hospitals NHS Trust, Eastern Road, Brighton,  
8 United Kingdom BN2 5BE

9

10 **\*Correspondence to:**

11 Stefano Caserta. Division of Clinical Medicine, BSMS - Brighton and Sussex Medical  
12 School, Medical Research Building, University of Sussex, Falmer BN1 9PS, UK

13 Phone: +44-(0)1273-877886; Fax: +44-(0)1273 877889; E-mail:

14 [s.caserta@bsms.ac.uk](mailto:s.caserta@bsms.ac.uk)

15

16 **Supplementary Material Contents:**

- 17 **1. Supplementary Figure 1 with Legend** pages 2-3  
18 **2. Supplementary Figure 2 with Legend** pages 4-5  
19 **3. Supplementary Figure 3 with Legend** pages 6-7  
20 **4. Supplementary Figure 4 with Legend** pages 8-10  
21 **5. Supplementary Table 1** pages 11-13  
22 **6. Supplementary Materials and Methods** pages 14-19  
23 **7. Supplementary References** pages 20-21

**A** [total Hb] as marker of hemolysis in plasma samples  
all patients values

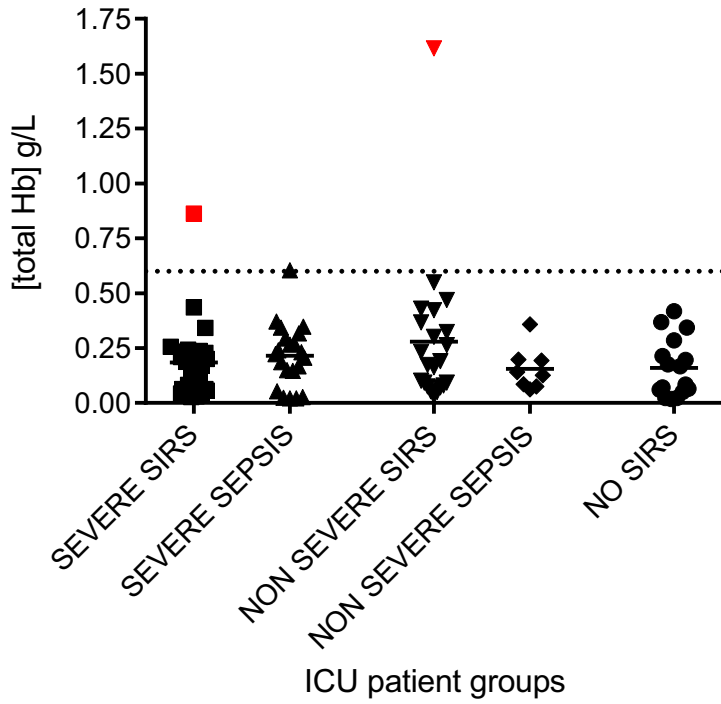

**B** [total Hb] in plasma from patients for NGS  
(excluding 2 outliers)

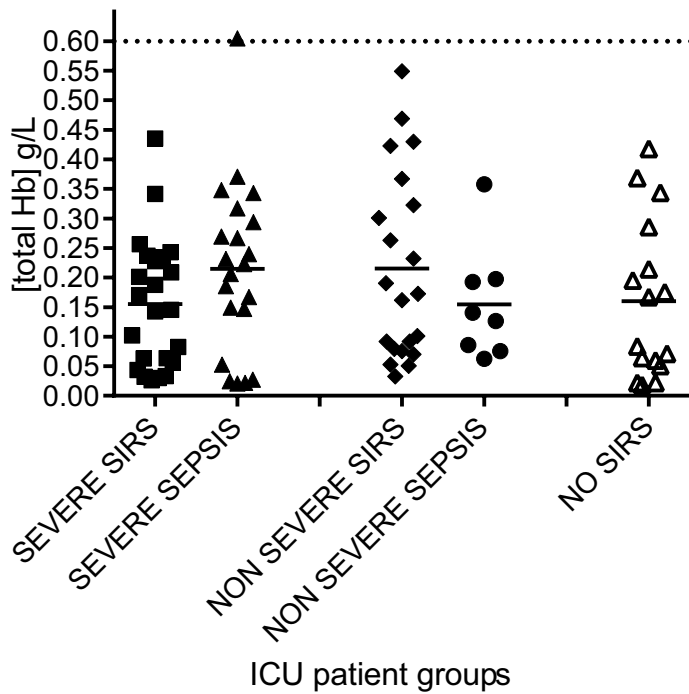

Supplementary Figure 1

## 1           **1 Supplementary Figure 1 with Legend**

2   **Supplementary Figure 1. Exclusion of hemolytic samples and average**  
3 **hemoglobin levels in the experimental cohort. A.** Hemolysis, which is marked in  
4 plasma if free hemoglobin (Hb) levels  $>0.6\text{g/L}$ , was measured by Harboe  
5 spectrophotometric method in any sample ( $n=91$ ). Shown measurements are the  
6 average of 3 technical replicates/patient. Hemolytic samples (red; 1 in the severe  
7 SIRS groups and 1 in the non-severe SIRS) were excluded from the study. **B.** Hb  
8 levels are shown in any experimental group used in NGS and miRNA Q-PCR array,  
9 after the exclusion of outliers. Importantly, average Hb did not differ significantly  
10 across groups, suggesting that RBC lysis is equally represented across the  
11 experimental groups prior to the NGS analysis. RBCs may be responsible for miRNA  
12 presence in the blood. Balancing the levels of miRNAs across experimental groups  
13 may also positively affect normalization. In fact in our analysis, the internal  
14 normalizer miR-486-5p is one of the most abundant miRNA circulating in blood and  
15 is mostly derived from RBC.

16  
17  
18  
19  
20  
21  
22  
23  
24  
25

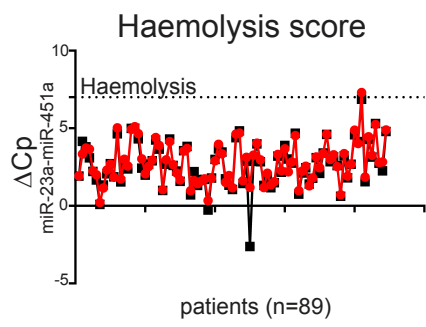

Supplementary Figure 2

## 2 Supplementary Figure 2 with Legend

**Supplementary Figure 2. Independent validation of hemolysis levels in miRNA qPCR arrays.** In Exiqon miRNA qPCR arrays, hemolysis is scored as a ratio of the Cp of miR-23a/miR-451a assays in two independent, technical repeat experiments - shown respectively in the black and in the red lines for each individual sample (x-axis, n=89). If the miR-23a/miR-451a ratio cut off  $>7$  is reached samples are excluded from any further analysis. In agreement with our previous spectrophotometric analysis (Supplementary Figure 1), the qPCR platform confirmed similar levels of hemolysis across the groups and only 1 patient sample in the severe sepsis group was deemed to be excluded from further analysis.

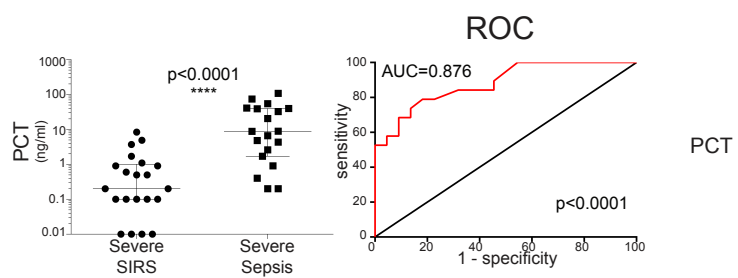

Supplementary Figure 3

### 3 Supplementary Figure 3 with Legend

**Supplementary Figure 3. Performance of traditional biomarker PCT in the Severe SIRS and Sepsis cohorts.** Left dot plots show PCT levels (ng/ml) in severe SIRS vs sepsis in individual samples (n=21 and n=23 for sepsis and SIRS respectively) together with the level of significance. The relative receiver operator curve (ROC, right) is shown with the Area Under the Curve (AUC).

# A

## ROC

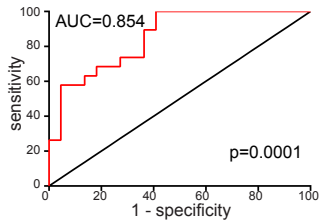

| Hierarchical logistic regression levels | Variables considered                                        | R square (% variance of independent variable) | p (level of significance) |
|-----------------------------------------|-------------------------------------------------------------|-----------------------------------------------|---------------------------|
| 1st                                     | SOFA; Sex; Age; Survival outcome; Time of sample collection | 0.122 (12.2%)                                 | 0.375 (ns)                |
| 2nd                                     | miR-30d                                                     | 0.424 (42.4%)                                 | 0.001 (***)               |

miR-30d

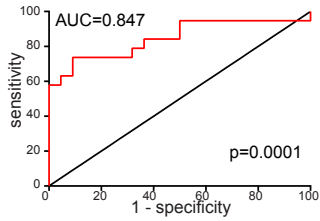

| Hierarchical logistic regression levels | Variables considered                                        | R square (% variance of independent variable) | p (level of significance) |
|-----------------------------------------|-------------------------------------------------------------|-----------------------------------------------|---------------------------|
| 1st                                     | SOFA; Sex; Age; Survival outcome; Time of sample collection | 0.129 (12.9%)                                 | 0.356 (ns)                |
| 2nd                                     | miR-30a                                                     | 0.418 (41.8%)                                 | 0.001 (***)               |

miR-30a

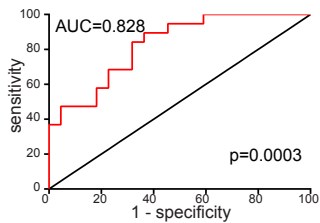

| Hierarchical logistic regression levels | Variables considered                                        | R square (% variance of independent variable) | p (level of significance) |
|-----------------------------------------|-------------------------------------------------------------|-----------------------------------------------|---------------------------|
| 1st                                     | SOFA; Sex; Age; Survival outcome; Time of sample collection | 0.122 (12.2%)                                 | 0.375 (ns)                |
| 2nd                                     | miR-192                                                     | 0.339 (33.9%)                                 | 0.009 (**)                |

miR-192

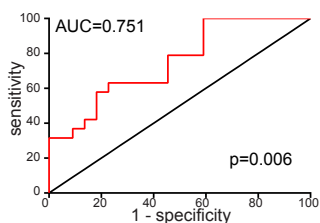

| Hierarchical logistic regression levels | Variables considered                                        | R square (% variance of independent variable) | p (level of significance) |
|-----------------------------------------|-------------------------------------------------------------|-----------------------------------------------|---------------------------|
| 1st                                     | SOFA; Sex; Age; Survival outcome; Time of sample collection | 0.122 (12.2%)                                 | 0.375 (ns)                |
| 2nd                                     | miR-26a                                                     | 0.293 (29.3%)                                 | 0.028 (*)                 |

miR-26a

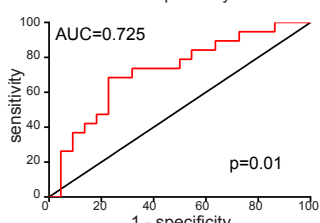

| Hierarchical logistic regression levels | Variables considered                                        | R square (% variance of independent variable) | p (level of significance) |
|-----------------------------------------|-------------------------------------------------------------|-----------------------------------------------|---------------------------|
| 1st                                     | SOFA; Sex; Age; Survival outcome; Time of sample collection | 0.122 (12.2%)                                 | 0.375 (ns)                |
| 2nd                                     | miR-23a                                                     | 0.293 (29.3%)                                 | 0.027 (*)                 |

miR-23a

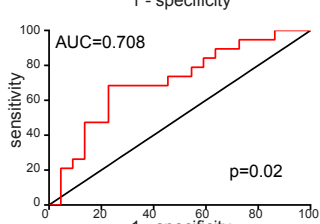

| Hierarchical logistic regression levels | Variables considered                                        | R square (% variance of independent variable) | p (level of significance) |
|-----------------------------------------|-------------------------------------------------------------|-----------------------------------------------|---------------------------|
| 1st                                     | SOFA; Sex; Age; Survival outcome; Time of sample collection | 0.122 (12.2%)                                 | 0.375 (ns)                |
| 2nd                                     | miR-191                                                     | 0.259 (25.9%)                                 | 0.056 (ns)                |

miR-191

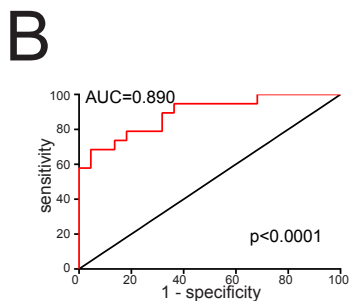

| Hierarchical logistic regression levels | Variables considered                                        | R square (% variance of independent variable) | p (level of significance) |
|-----------------------------------------|-------------------------------------------------------------|-----------------------------------------------|---------------------------|
| 1st                                     | SOFA; Sex; Age; Survival outcome; Time of sample collection | 0.129 (12.9%)                                 | 0.356 (ns)                |
| 2nd                                     | miR-30d; miR-30a; miR-192; miR-26a; miR-23a; miR-191        | 0.535 (53.5%)                                 | 0.001 (***)               |

combined

Supplementary Figure 4



## 4 Supplementary Figure 4 with Legend

### Supplementary Figure 4. Single or combined CIR-miRNAs discriminate Severe SIRS and Sepsis after correction for multiple confounding variables.

Hierarchical binary logistic regression models of the Sepsis/SIRS predictive value were generated based on each of the top 6 CIR-miRNAs (**A**), and their combination (**B**), after controlling for a number of confounding variables. The confounding variables (SOFA score, age, sex, patient survival outcome, and time of sample collection) were introduced at the first level (block 1) of the regression models.

Thereafter, in the 2<sup>nd</sup> level (block 2) of the analyses, each individual miRNAs (**A**) or the combination of the top 6 CIR-miRNAs (**B**) were assessed for the capacity to predict a significant amount of the variance of the probability of having Sepsis versus SIRS. In **A.** and **B.**, left panels show the receiver operator curves (ROC) of each model interpolation of the experimental cohorts (based on the relative regression equations), the level of significance of the difference between the interpolated cohorts, and the resulting Area Under the Curve (AUC). For each model, the tables (right) list the variables introduced at each step of the hierarchical binary logistic regression together with the resulting (Cox and Snell) R square values (the percentages of the variance in the predictive value) with levels of significance after the first and the second regression steps (i.e., the total model significance). R squares values show that, in any case, the confounding variables introduced at step 1 did not account significantly for the prediction of sepsis vs SIRS, as expected ( $p > 0.05$ , 1<sup>st</sup> step). At the second step, all miRNAs significantly improved the prediction of sepsis and SIRS and could account for 26-42% (miRNAs used alone, **A**) or 53.5% (top 6 CIR-miRNAs combined, **B**) of the variance in the probability of having Sepsis/SIRS. This suggests that the predictive values of the top 6 CIR-

1 miRNA is preserved after controlling for a number of confounding variables. In the  
2 case of miR-191, even if the total significance of the model is  $p=0.056$ , the second  
3 step significantly improved the model prediction ( $p=0.008$ ). It should be noted that  
4 since in our study SOFA and age were rigorously matched the interval of these  
5 variables is consequently limited (see Table 1). As patients were coming from the  
6 same ICU type, this was not deemed to be a confounding variable in our study.  
7 (n=21 and n=23 for sepsis and SIRS respectively, except n=20 in sepsis for miR-30a  
8 and the combined score)

9  
10  
11  
12  
13  
14  
15  
16  
17  
18  
19  
20  
21  
22  
23  
24  
25

1 **5 Supplementary Table 1. The levels of 116 circulating**  
 2 **miRNAs shortlisted after NGS in sepsis and SIRS.**

| <b>miRNA ID</b>   | <b>s.sepsis vs NO SIRS fd</b> | <b>s.SIRS vs NO SIRS fd</b> | <b>S.Sepsis vs S.SIRS fd</b> | <b>Notes*</b> |
|-------------------|-------------------------------|-----------------------------|------------------------------|---------------|
| hsa-miR-208b-3p   | 0.85                          | 128.93                      | 0.01                         | >15; <35      |
| hsa-miR-133a-3p   | 0.63                          | 20.47                       | 0.03                         | >15; <35      |
| hsa-miR-122-5p    | 1.09                          | 6.66                        | 0.16                         |               |
| hsa-miR-10b-5p    | 0.49                          | 2.40                        | 0.21                         |               |
| hsa-miR-3591-3p   | 1.53                          | 7.35                        | 0.21                         |               |
| hsa-miR-378a-3p   | 2.27                          | 9.13                        | 0.25                         |               |
| hsa-miR-192-5p    | 1.73                          | 6.84                        | 0.25                         |               |
| hsa-miR-375       | 2.03                          | 7.28                        | 0.28                         |               |
| hsa-miR-125b-2-3p | 1.93                          | 6.30                        | 0.31                         | >15; <35      |
| hsa-miR-30a-5p    | 0.73                          | 2.36                        | 0.31                         |               |
| hsa-miR-10a-5p    | 1.09                          | 3.35                        | 0.32                         |               |
| hsa-miR-181c-5p   | 2.11                          | 5.91                        | 0.36                         | >15; <35      |
| hsa-miR-423-5p    | 1.16                          | 3.18                        | 0.36                         |               |
| hsa-let-7f-5p     | 0.98                          | 2.65                        | 0.37                         |               |
| hsa-miR-3184-3p   | 1.15                          | 3.10                        | 0.37                         |               |
| hsa-miR-1307-5p   | 1.97                          | 5.04                        | 0.39                         | >15; <35      |
| hsa-miR-26b-5p    | 1.03                          | 2.63                        | 0.39                         |               |
| hsa-miR-142-3p    | 1.34                          | 3.36                        | 0.40                         | >15; <35      |
| hsa-miR-150-5p    | 1.42                          | 3.46                        | 0.41                         | >15; <35      |
| hsa-miR-30e-3p    | 1.14                          | 2.78                        | 0.41                         | >15; <35      |
| hsa-let-7d-5p     | 0.99                          | 2.40                        | 0.41                         | >15; <35      |
| hsa-miR-148a-5p   | 2.33                          | 5.46                        | 0.43                         | >15; <35      |
| hsa-miR-27b-3p    | 1.82                          | 4.24                        | 0.43                         |               |
| hsa-let-7a-5p     | 0.85                          | 1.94                        | 0.44                         |               |
| hsa-miR-744-5p    | 1.17                          | 2.66                        | 0.44                         |               |
| hsa-let-7c-5p     | 0.99                          | 2.23                        | 0.45                         | >15; <35      |
| hsa-miR-28-3p     | 1.26                          | 2.81                        | 0.45                         |               |
| hsa-miR-29a-3p    | 1.23                          | 2.75                        | 0.45                         | >15; <35      |
| hsa-miR-1246      | 1.36                          | 3.01                        | 0.45                         |               |
| hsa-miR-340-5p    | 1.31                          | 2.89                        | 0.45                         |               |
| hsa-miR-181a-5p   | 1.92                          | 4.11                        | 0.47                         |               |
| hsa-miR-222-3p    | 1.75                          | 3.71                        | 0.47                         | >15; <35      |
| hsa-miR-181b-5p   | 1.51                          | 3.20                        | 0.47                         |               |
| hsa-miR-98-5p     | 0.90                          | 1.89                        | 0.47                         | >15; <35      |
| hsa-miR-409-3p    | 1.83                          | 3.84                        | 0.48                         |               |
| hsa-miR-182-5p    | 0.87                          | 1.82                        | 0.48                         |               |
| hsa-miR-423-3p    | 2.01                          | 4.18                        | 0.48                         |               |

|                 |      |      |      |          |
|-----------------|------|------|------|----------|
| hsa-miR-3184-5p | 2.32 | 4.76 | 0.49 | >15; <35 |
| hsa-miR-148a-3p | 1.81 | 3.70 | 0.49 |          |
| hsa-miR-144-5p  | 1.43 | 2.80 | 0.51 | >15; <35 |
| hsa-miR-769-5p  | 2.44 | 4.74 | 0.52 | >15; <35 |
| hsa-miR-342-3p  | 1.08 | 2.10 | 0.52 | >15; <35 |
| hsa-miR-410-3p  | 1.51 | 2.89 | 0.52 | >15; <35 |
| hsa-miR-26a-5p  | 1.35 | 2.54 | 0.53 |          |
| hsa-miR-22-3p   | 2.12 | 3.99 | 0.53 |          |
| hsa-miR-99a-5p  | 1.30 | 2.44 | 0.53 | >15; <35 |
| hsa-miR-103b    | 1.52 | 2.85 | 0.53 |          |
| hsa-miR-103a-3p | 1.53 | 2.85 | 0.54 |          |
| hsa-miR-100-5p  | 1.20 | 2.23 | 0.54 | >15; <35 |
| hsa-miR-148b-3p | 1.15 | 2.14 | 0.54 |          |
| hsa-miR-151a-3p | 0.95 | 1.76 | 0.54 |          |
| hsa-miR-199b-3p | 1.49 | 2.73 | 0.54 | >15; <35 |
| hsa-miR-27a-3p  | 1.99 | 3.64 | 0.55 |          |
| hsa-miR-151a-5p | 1.40 | 2.55 | 0.55 |          |
| hsa-miR-126-3p  | 1.31 | 2.35 | 0.56 | >15; <35 |
| hsa-miR-199a-3p | 1.66 | 2.86 | 0.58 | >15; <35 |
| hsa-miR-24-3p   | 1.13 | 1.93 | 0.58 | >15; <35 |
| hsa-miR-101-3p  | 1.63 | 2.78 | 0.58 |          |
| hsa-miR-30d-5p  | 1.48 | 2.51 | 0.59 |          |
| hsa-miR-191-5p  | 0.75 | 1.27 | 0.59 |          |
| hsa-let-7i-5p   | 1.56 | 2.63 | 0.59 |          |
| hsa-miR-143-3p  | 1.68 | 2.81 | 0.60 |          |
| hsa-miR-107     | 1.68 | 2.79 | 0.60 |          |
| hsa-miR-1307-3p | 1.65 | 2.73 | 0.60 | >15; <35 |
| hsa-miR-150-3p  | 0.64 | 1.05 | 0.61 | >15; <35 |
| hsa-miR-451a    | 1.53 | 2.51 | 0.61 |          |
| hsa-let-7b-5p   | 1.31 | 2.11 | 0.62 |          |
| hsa-miR-127-3p  | 1.49 | 2.36 | 0.63 |          |
| hsa-miR-125a-5p | 1.52 | 2.39 | 0.63 | >15; <35 |
| hsa-miR-130a-3p | 1.41 | 2.23 | 0.63 |          |
| hsa-let-7d-3p   | 1.83 | 2.88 | 0.64 | >15; <35 |
| hsa-miR-140-3p  | 2.17 | 3.39 | 0.64 |          |
| hsa-miR-345-5p  | 3.54 | 5.53 | 0.64 | >15; <35 |
| hsa-miR-584-5p  | 1.07 | 1.67 | 0.64 |          |
| hsa-miR-21-5p   | 1.67 | 2.52 | 0.66 |          |
| hsa-miR-532-5p  | 2.21 | 3.32 | 0.66 | >15; <35 |
| hsa-miR-19b-3p  | 1.71 | 2.51 | 0.68 | >15; <35 |
| hsa-miR-146a-5p | 1.30 | 1.88 | 0.69 |          |
| hsa-miR-93-5p   | 2.02 | 2.91 | 0.69 |          |
| hsa-miR-301a-3p | 1.87 | 2.69 | 0.69 | >15; <35 |
| hsa-miR-128-3p  | 1.49 | 2.14 | 0.70 | >15; <35 |

|                       |      |      |      |          |
|-----------------------|------|------|------|----------|
| hsa-miR-223-3p        | 1.91 | 2.72 | 0.70 |          |
| hsa-miR-210-3p        | 3.83 | 5.42 | 0.71 | >15; <35 |
| hsa-miR-126-5p        | 0.76 | 1.08 | 0.71 |          |
| hsa-miR-25-3p         | 1.88 | 2.64 | 0.71 |          |
| hsa-miR-92a-3p        | 1.35 | 1.84 | 0.73 |          |
| hsa-miR-106b-3p       | 2.66 | 3.61 | 0.74 | >15; <35 |
| hsa-miR-146b-5p       | 1.38 | 1.85 | 0.74 |          |
| hsa-miR-186-5p        | 1.60 | 2.14 | 0.75 |          |
| hsa-miR-3074-5p       | 1.07 | 1.42 | 0.75 | >15; <35 |
| hsa-miR-23a-3p        | 1.72 | 2.24 | 0.77 | >15; <35 |
| hsa-miR-30e-5p        | 1.60 | 2.08 | 0.77 |          |
| hsa-miR-421           | 1.80 | 2.33 | 0.77 | >15; <35 |
| hsa-let-7g-5p         | 2.02 | 2.60 | 0.77 |          |
| hsa-miR-484           | 1.78 | 2.27 | 0.78 | >15; <35 |
| hsa-miR-142-5p        | 1.97 | 2.52 | 0.78 |          |
| hsa-miR-221-3p        | 1.49 | 1.84 | 0.81 |          |
| hsa-miR-320b          | 2.30 | 2.65 | 0.87 | >15; <35 |
| hsa-miR-425-5p        | 2.35 | 2.68 | 0.88 |          |
| hsa-miR-486-3p        | 1.28 | 1.45 | 0.88 |          |
| hsa-miR-21-3p         | 2.46 | 2.75 | 0.89 |          |
| hsa-miR-15a-5p        | 1.76 | 1.90 | 0.92 |          |
| hsa-miR-130b-3p       | 1.78 | 1.87 | 0.95 |          |
| hsa-miR-144-3p        | 0.80 | 0.79 | 1.02 | >15; <35 |
| <b>hsa-miR-92b-3p</b> | 1.09 | 1.06 | 1.03 | >15; <35 |
| hsa-miR-363-3p        | 1.74 | 1.62 | 1.07 |          |
| hsa-miR-500a-3p       | 2.64 | 2.44 | 1.08 | >15; <35 |
| <b>hsa-miR-320a</b>   | 1.93 | 1.69 | 1.14 |          |
| hsa-miR-99b-5p        | 0.96 | 0.83 | 1.15 |          |
| <b>hsa-miR-486-5p</b> | 0.97 | 0.84 | 1.16 |          |
| hsa-miR-16-5p         | 2.14 | 1.72 | 1.25 |          |
| hsa-miR-652-3p        | 3.72 | 2.53 | 1.47 | >15; <35 |
| hsa-miR-223-5p        | 4.49 | 2.76 | 1.62 | >15; <35 |
| hsa-miR-941           | 3.46 | 2.00 | 1.73 |          |
| hsa-miR-183-5p        | 0.92 | 0.53 | 1.74 | >15; <35 |
| hsa-miR-501-3p        | 1.00 | 0.36 | 2.78 | >15; <35 |

1 \*If miRNA NGS counts were more than  $15/10^5$  but less than  $35/10^5$  (light grey  
2 boxes) we did not generally proceed to the following Q-PCR validation. Candidate  
3 normalizers are shown in bold. miRNAs decreased or increased in sepsis compared  
4 to SIRS are highlighted respectively in green and in red boxes, whilst light blue  
5 boxes indicate potential normalizers.

6

## 7 **6 Supplementary Materials and Methods**

### 8 **Sample handling and normalization of hemolysis**

9 Study blood samples were collected in Na-citrate tubes from patients within 6 hours  
10 of ICU admission and centrifuged. Plasma was stored at  $-80^{\circ}\text{C}$  until the day of  
11 analysis, thawed on ice and kept at  $4^{\circ}\text{C}$  until the RNA extraction. Plasma was stored  
12 at  $-80^{\circ}\text{C}$  until the day of analysis, thawed on ice and kept at  $4^{\circ}\text{C}$  until the RNA  
13 extraction. Red blood cell (RBC) lysis during sample handling has the potential to  
14 bias microRNA content in plasma<sup>1-4</sup>. The concentration of free hemoglobin ([Hb]) in  
15 plasma reflects the degree of any hemolysis<sup>5</sup>. Free [Hb] in patient samples was  
16 assessed by the Harboe spectrophotometric method<sup>6,7</sup> and samples with  $[\text{Hb}] > 0.6\text{g/L}$   
17 were excluded from further analysis<sup>8</sup>. Briefly, the total [Hb] in a freshly prepared Hb  
18 standard was validated using SysMex SLS-technology<sup>9</sup> to detect any Hb form in the  
19 human blood. Standard dilutions and plasma samples (1:10) were tested in triplicate  
20 to determine the A415, A380, and A450 and the Harboe  $[\text{oxy-Hb}]^5$  was:  $[\text{oxy-Hb}]$   
21  $(\text{g/l}) = 167 \times (\text{A415}) - 84 \times (\text{A380}) - 84 \times (\text{A450})$ . Harboe oxy-Hb and total Hb content of  
22 the standards were linearly interpolated to quantitate total Hb in each sample. In  
23 qPCR miRNA arrays, further assessment of hemolysis in individual samples was  
24 made by calculating the ratio of miR-23a to miR-451a and using a cut-off  $>7$  to  
25 indicate significant hemolysis<sup>10</sup>.

## 1 **Plasma RNA extraction and NGS of plasma miRNA**

2 After exclusion of hemolysis specimens, plasma pools were formed by combining  
3 equal volumes of patients' plasma in the groups of Table 1. Total RNA was extracted  
4 from 2.5 ml plasma using the miRVana™ PARIS™ technology kit (Life  
5 Technologies)<sup>11</sup>. Briefly, each sample was denatured and processed according to  
6 manufacturer's instructions to extract RNA with Acid-Phenol:CHCl<sub>3</sub>; the recovered  
7 aqueous phase was mixed with ethanol (molecular biology grade; SIGMA; 1:1.25)  
8 and loaded onto replicate columns to bind RNA. After multiple column washes, RNA  
9 was eluted in 95°C DEPC-treated H<sub>2</sub>O (Life Technologies) from replicate columns,  
10 pooled and quantified using a Nanodrop spectrophotometer. Typically we recovered  
11 679±165 pg RNA/μl of plasma (mean±SD). On the same day, an average RNA input  
12 of 849±206 ng (mean±SD) was created for technical duplicates of NGS and stored at  
13 -80°C. Before cDNA library preparation for NGS, RNA preparations were validated  
14 for the presence of miRNA using a Taqman miRNA assay (Life Technologies) for  
15 human miR-16. NGS cDNA libraries were prepared and validated from plasma RNA  
16 by ARK Genomics (University of Edinburgh, UK), following manufacturer  
17 instructions, with specific barcodes for each cDNA library (Illumina TruSeq Small  
18 RNA sample protocol). Briefly, samples were ligated with an adapter (3' end) and a  
19 primer (5' end) before being reversely transcribed. The cDNA obtained was used as  
20 a template for PCR to add sample specific barcodes and extend adapters.  
21 Thereafter, samples were purified by electrophoresis (6% polyacrylamide gels) and  
22 bands corresponding to ~22 nucleotides in the original sample were size-selected  
23 (correct insert size: 146bp) after band staining and visualization under UV-light. The  
24 amplified size selected DNA was extracted from the gel by overnight soaking (H<sub>2</sub>O)  
25 and concentrated. The final preparation was checked for size and potential adapter-

1 dimer contamination by electrophoresis. The libraries were finally eluted from gels  
2 and run on the High Sensitivity D1K ScreenTape (Agilent Technologies) to determine  
3 size and purity prior to final quantification by qPCR and sequenced on a HiSeq™  
4 2500 Illumina instrument by loading duplicate libraries on separate lanes. In each  
5 lane,  $\sim 10^8$  NGS reads were acquired and, after filtering and sorting by library  
6 barcodes, sequences in any sample were mapped to the miRBase (release 20)  
7 database. The resulting mapped reads (called counts) were arbitrarily normalized as  
8 miRNA counts/ $10^5$ .

9

#### 10 **qPCR miRNA array sample preparation**

11 Total RNA was extracted from plasma of individual patients using the miRCURY™  
12 RNA isolation - biofluids kit (Exiqon, Vedbaek, Denmark). Plasma was thawed on ice  
13 and centrifuged (3000g, 5 min, 4°C). For each sample, plasma (200  $\mu$ L) was mixed  
14 with 60  $\mu$ l of Lysis solution BF containing 1  $\mu$ g carrier-RNA per 60 $\mu$ l Lysis Solution  
15 BF and RNA spike-in template mixture (UniSp4, UniSp3 and UniSp6). Samples were  
16 vortexed briefly and incubated 3 min at room temperature, before adding 20  $\mu$ L  
17 Protein Precipitation solution BF. Samples were vortexed, incubated 1 min at room  
18 temperature and centrifuged (11000g, 3 min). Clear supernatants were mixed with  
19 isopropanol (270  $\mu$ L, SIGMA), briefly vortexed and loaded onto binding columns.  
20 After multiple washes, RNA was eluted in RNase-free H<sub>2</sub>O by centrifugation  
21 (11000g) and stored at -80°C.

22

#### 23 **microRNA real-time qPCR array and analysis**

24 RNA (2  $\mu$ l) was reverse transcribed using the miRCURY LNA™ Universal RT  
25 microRNA PCR, Polyadenylation and cDNA synthesis kit (Exiqon). cDNA (1:50) was



1 assayed in qPCR as by the miRCURY LNA™ Universal RT microRNA PCR protocol.  
2 Each microRNA was assayed once by qPCR (on the microRNA Ready-to-Use PCR,  
3 Pick-&-Mix using ExiLENT SYBR® Green master mix) in 2 independent technical  
4 repeat experiments including negative controls (no-template from the reverse  
5 transcription reaction). In each experimental group, ≥8 biological replicates were  
6 included. The amplification was performed in a LightCycler® 480 Real-Time PCR  
7 System (Roche) in 384-well plates. The amplification curves were analyzed using the  
8 Roche LC software, both for determination of Cq (2nd derivative method) and for  
9 melting curve analysis. Amplification efficiency was calculated using a linear  
10 regression method. All assays were inspected for distinct melting curves and the T<sub>m</sub>  
11 was confirmed to be within known specifications for the assay. Assays returning 3  
12 Cq less than the negative control and Cq<37 were accepted and sample runs not  
13 matching these criteria were omitted from further analysis (e.g., miR-92b-3p).  
14 The stability values of candidate normalizers were assessed using the 'NormFinder'  
15 software<sup>12</sup>. Any qPCR data was normalized to the average Cp of internal normalizers  
16 detected in all samples (delta Cp; dCp=normalizer Cp–assay Cp). All miRNA  
17 analyses were conducted blind to the clinical data.

18

### 19 **Cytokine and inflammatory biomarker measurements**

20 Cytokine levels (IL-6, IL-8, IL-1β) were measured on a Luminex LX200 using  
21 Invitrogen's Human Inflammatory 5-Plex panel (Invitrogen/Life Technologies,  
22 Darmstadt, Germany) and Millipore filter plates (VWR Darmstadt) as per  
23 manufacturers' instructions. PCT was measured on a Kryptor instrument (Brahms,  
24 Henningsdorf, Germany). Levels of sCD25 were measured on commercially  
25 available microplate assays (Human IL-2 sRa (sCD25) OptEIA Set, Becton

1 Dickenson, San Diego, CA). All biomarker analyses were conducted blind to the  
2 clinical data as previously shown<sup>13</sup>.

3

#### 4 **Statistical analyses**

5 Unless specified, datasets were analyzed and plotted (including receiver operator  
6 curves, ROC) using the GraphPad Prism 6 and/or IBM SPSS Statistics 22 software.  
7 The D'Agostino and Pearson omnibus and/or Shapiro-Wilk tests were used to test  
8 normal data distribution. If not normally distributed, medians with interquartile ranges  
9 (IQR, rather than means and standard deviation, SD) are shown and Mann-Whitney  
10 U Test (rather than t-) tests were used to calculate p-values in 2-group comparisons.  
11 Significances across more than 2 groups were assessed by ANOVA (Kruskal-Wallis  
12 test). For the qPCR miRNA array dataset, a multiple testing correction was used to  
13 adjust ordinary p-values in order to control for the number of false positives  
14 (Benjamini-Hochberg adjusted p-values<sup>14</sup>). The CIR-miRNA score was generated as  
15 a linear combination of the top performing 6 miRNA measurements in severe sepsis  
16 and SIRS patients (n=40) and interpolated using IBM SPSS Statistics 22 by binary  
17 logistic regression to predict SIRS vs sepsis. In particular, the CIR-miRNA score (S)  
18 was mathematically defined as:  $S = a_1x_1 + a_2x_2 + a_3x_3 + a_4x_4 + a_5x_5 + a_6x_6 + k$  where  
19  $x_{1-6}$  are the measurements of the top 6 miRNAs in a specific individual and the  
20 variables,  $a_{1-6}$ , and the constant, k, are the coefficients returned by the binary logistic  
21 regression model. In mathematical terms, the CIR-miRNA score is the natural  
22 logarithm of the odds of having SIRS vs sepsis given the measurements of the 6 top  
23 miRNAs, that is  $ODDS=e^S$ . Correlations between the interpolated CIR-miRNA scores  
24 and plasma levels of inflammatory mediators were evaluated using the Spearman  
25 rho and significances of the correlations in GraphPad Prism 6. Prior to assessing if

1 the sepsis/SIRS predictive value of CIR-miRNAs is preserved after adjusting for  
2 confounding variables, we verified the normal distribution of miRNA levels  
3 (continuous variables) and used IBM SPSS Statistics 22 multiple regression and  
4 hierarchical multiple regression to assess whether the confounding variables (SOFA  
5 score, age, sex, patient survival outcome, and time of sample collection) affect CIR-  
6 miRNA levels. It was noted that despite SOFA significantly correlates with levels of  
7 (in decreasing order) miR-191-5p ( $R=-0.437$ ,  $p=0.002$ ), miR-26a-5p ( $R=-0.335$ ,  
8  $p=0.016$ ) and miR-23a-3p ( $R=-0.262$ ,  $p=0.049$ ) and Age weakly correlates with miR-  
9 192-5p ( $R=-0.295$ ,  $p=0.031$ ), in the intervals analysed in this study (Table 1), such  
10 effects were weak and not significant when corrected for other confounding  
11 variables. We then used IBM SPSS Statistics 22 hierarchical binary logistic  
12 regression models to assess if the Sepsis/SIRS predictive value is preserved after  
13 adjusting for the same confounding variables. In SPSS, SOFA score, age, sex,  
14 patient survival outcome, and time of sample collection (confounding variables) were  
15 force-entered in one block at step 1 of the regression models. Thereafter, in block 2  
16 individual miRNAs or the top 6 CIR-miRNAs combined in one block were entered. In  
17 every case, step 2 significance was  $p<0.05$  and the -2 Log likelihood improved over  
18 previous steps and the final model significance is shown in Supplementary Fig.4.  
19 The model coefficients from the “variables in the equation” SPSS output were then  
20 used to build the regression mathematical equations relative to each model in a  
21 similar manner as described above.

22

23

24

25

## 7. Supplemental Materials and Methods References

- 1  
2
- 3 1 Azzouzi, I., Schmutz, M. & Speer, O. MicroRNAs as components of  
4 regulatory networks controlling erythropoiesis. *Eur. J. Haematol.* **89**, 1-9;  
5 DOI:10.1111/j.1600-0609.2012.01774.x (2012).
- 6 2 Pritchard, C. C. *et al.* Blood cell origin of circulating microRNAs: a cautionary  
7 note for cancer biomarker studies. *Cancer Prev. Res. (Phila.)* **5**, 492-497;  
8 DOI:10.1158/1940-6207.CAPR-11-0370 (2012).
- 9 3 Kirschner, M. B. *et al.* The Impact of Hemolysis on Cell-Free microRNA  
10 Biomarkers. *Frontiers in genetics* **4**, 94; DOI:10.3389/fgene.2013.00094  
11 (2013).
- 12 4 Kirschner, M. B. *et al.* Haemolysis during sample preparation alters microRNA  
13 content of plasma. *PLoS One* **6**, e24145; DOI:10.1371/journal.pone.0024145  
14 (2011).
- 15 5 Han, V., Serrano, K. & Devine, D. V. A comparative study of common  
16 techniques used to measure haemolysis in stored red cell concentrates. *Vox*  
17 *Sang.* **98**, 116-123; DOI:10.1111/j.1423-0410.2009.01249.x (2010).
- 18 6 Harboe, M. A method for determination of hemoglobin in plasma by near-  
19 ultraviolet spectrophotometry. *Scand. J. Clin. Lab. Invest.* **11**, 66-70;  
20 DOI:10.3109/00365515909060410 (1959).
- 21 7 Adamzik, M. *et al.* Free hemoglobin concentration in severe sepsis: methods  
22 of measurement and prediction of outcome. *Crit. Care* **16**, R125;  
23 DOI:10.1186/cc11425 (2012).

1 8 Lippi, G., Salvagno, G. L., Montagnana, M., Brocco, G. & Guidi, G. C.  
2 Influence of hemolysis on routine clinical chemistry testing. *Clin. Chem. Lab.*  
3 *Med.* **44**, 311-316; DOI:10.1515/CCLM.2006.054 (2006).

4 9 Oshiro, I., Takenaka, T. & Maeda, J. New method for hemoglobin  
5 determination by using sodium lauryl sulfate (SLS). *Clin. Biochem.* **15**, 83-88;  
6 DOI:10.1016/S0009-9120(82)91069-4 (1982).

7 10 Blondal, T. *et al.* Assessing sample and miRNA profile quality in serum and  
8 plasma or other biofluids. *Methods* **59**, S1-6;  
9 DOI:10.1016/j.ymeth.2012.09.015 (2013).

10 11 Jones, C. I. *et al.* Identification of circulating microRNAs as diagnostic  
11 biomarkers for use in multiple myeloma. *Br. J. Cancer* **107**, 1987-1996;  
12 DOI:10.1038/bjc.2012.525 (2012).

13 12 Andersen, C. L., Jensen, J. L. & Orntoft, T. F. Normalization of real-time  
14 quantitative reverse transcription-PCR data: a model-based variance  
15 estimation approach to identify genes suited for normalization, applied to  
16 bladder and colon cancer data sets. *Cancer Res.* **64**, 5245-5250;  
17 DOI:10.1158/0008-5472.CAN-04-0496 (2004).

18 13 Llewelyn, M. J. *et al.* Sepsis biomarkers in unselected patients on admission  
19 to intensive or high-dependency care. *Crit. Care* **17**, R60;  
20 DOI:10.1186/cc12588 (2013).

21 14 Benjamini, Y. & Hochberg, Y. Controlling the False Discovery Rate: A  
22 Practical and Powerful Approach to Multiple Testing. *J R Stat Soc Series B*  
23 *Stat Methodol* **57**, 289-300; DOI:10.2307/2346101 (1995).

24
